**APPENDIX TO**  
**“ANATOMY OF A PREMODERN STATE”,**  
**by Leonor F. Costa, António Henriques and Nuno Palma**  
**(FOR ONLINE PUBLICATION ONLY)**

**APPENDIX A—DISAGGREGATED DATA, SOURCE CRITICISM, AND METHODOLOGICAL NOTES**

*Note: the sources cited Appendix A are listed in Appendix B*

**A1—Definition of imperial revenues**

We define imperial revenues as revenues coming to the central treasury of mainland Portugal from the sale or direct administration of imperial trading monopolies in overseas locations beyond Europe. These include contracts and revenues from Guinea (Guiné), Mina, Angola, and São Tomé associated with gold, spices, and the slave trade, the gold transferred to mainland Portugal (see A2 below) as well as brazilwood (*pau brasil*) and the revenues of the *Casa da Índia* related to the pepper monopoly. We did not consider as imperial revenues any taxes paid in Brazil or in the *Estado da Índia* (as these were spent locally rather than transferred to mainland Portugal) such as the *dízimos do padroado* in Brazil. Importantly, our criterion leaves out of the monopoly on the tobacco trade, which corresponded to between 14% and 21% of the imperial revenues (Salvado 2014). Under our criterion, the tobacco monopoly cannot be considered as an imperial revenue because most of the value added came from industrial transformation of tobacco leaves in Portugal and its sales in the country. The raw leaves imported from Brazil only constituted a marginal share of the total value. Furthermore, the monopoly was independent of the source market—for example, there was no obligation to buy the leaves from Brazil, and tobacco from Virginia was also used when necessary.

**A2—Notes on eighteenth-century Brazilian gold remittances**

Crown revenues concerning taxing of gold production in Brazil were generally called *quinto do ouro*, even though that in fact corresponds to four different fiscal systems which developed after gold was discovered in the late seventeenth century until more than a century later.

From 1697 to 1713, one-fifth of the value of mining output was charged to miners, even though enforcement was relatively limited during this initial period. Revenues were collected both in the mines themselves via guards (*guardas-mores*) and in the local mints. From December 7, 1713, until September 30, 1724, a second fiscal regime was in place, whereby a fixed taxation value was paid per slave and commercial establishment (*capitação*). To minimize tax fraud, a minimum revenue of 30 *arrobas* was to be collected; any calculation falling behind that value had to be covered anyway.

From October 1724 to July 1735, the taxation system based on one-fifth of revenues returned, but this time it was paid exclusively in the mint houses (*Casas da Fundição*). To ensure compliance, minting was compulsory—it was forbidden to transport gold dust. From 1735 to 1751, a system similar to that of 1713–1724 returned (*capitação*). On December 3, 1750, the fifth paid in the Mint Houses returned, and a minimum of 100 *arrobas* had to be paid. This system then continued for the remainder of the century.

As our summary shows, the tax system usually called *quintos do ouro* in fact comprised a variation of different taxation methods which changed over time. Furthermore, it is important to notice that only the net amount of taxation, after local Crown costs were paid, was in fact transported back to mainland Portugal. Hence, the so-called *quintos*, or fifths of gold registered, did not always correspond to a 20% tax on production. The same applied to the 1% transportation fee (*manifestos*). See Costa et al. (2013) and Costa et al., s.d..

**Table A1.** Nominal revenues (*contos de reis*)

| year | revenue | sources                            |
|------|---------|------------------------------------|
| 1367 | 1.9     | Henriques (2009, p. 98)            |
| 1401 | 23.3    | Henriques (2009, p.160)            |
| 1473 | 48.3    | Henriques (2009, p.166)            |
| 1506 | 67.5    | Godinho (1978)                     |
| 1511 | 98.0    | Torre do Tombo, Núcleo Antigo, 532 |
| 1519 | 160.7   | Godinho (1978)                     |
| 1524 | 155.6   | Pinto (2013a, pp. 53–59)           |
| 1526 | 155.9   | Pereira (2003, pp. 154–156)        |
| 1527 | 155.5   | Pereira (2003, pp. 205–210)        |

|           |             |                                                                                                                                                    |
|-----------|-------------|----------------------------------------------------------------------------------------------------------------------------------------------------|
| 1534      | 153.7       | Sanceau (1973, pp. 37–39)                                                                                                                          |
| 1543      | 190.2       | Pinto (2013b, pp. 161–64)                                                                                                                          |
| 1557      | 303.5       | Rego (1960, vol. 1, pp. 891–95)                                                                                                                    |
| 1563      | 209.4       | Pinto (2013c, pp. 169–72)                                                                                                                          |
| 1588      | 462.9       | Godinho (1978)                                                                                                                                     |
| 1593      | 560.1       | Luz (1949)                                                                                                                                         |
| 1607      | 911.4       | Falcão (1859)                                                                                                                                      |
| 1619      | 783.7       | Oliveira (1620)                                                                                                                                    |
| 1625      | 708.7       | Hespanha (1994, pp. 124–5)                                                                                                                         |
| 1632      | 1,129.2     | Carrara (2011, p. 47)                                                                                                                              |
| 1645      | 1,266.1     | Dias (1985); completed with Biblioteca da Ajuda, Manuscritos, 51-VI-19, folia 359–364; Biblioteca D. Manuel II, Manuscritos, ADQ 094, folia 26–28. |
| 1656      | 1,466.7     | Prestage (1920, p. 9) completed with Biblioteca da Ajuda, Manuscritos, 51-VI-19, folia 359–364; Hespanha (1994, p. 158)                            |
| 1660      | 1,788.9     | Hespanha (1994, pp. 114) completed with Biblioteca da Ajuda, Manuscritos, 51-VI-19, folia 359–364                                                  |
| 1681      | 1,702.2     | Dias (1985)                                                                                                                                        |
| 1716      | 4,342       | Santarém (1850) plus the average of the 1681 and 1730 <i>décima</i> from Dias (1985) and Carrara (2011, p. 53)                                     |
| 1730      | 6,356       | Humbert (1730, pp.166–68) and Carrara (2011, p. 55)                                                                                                |
| 1762–1777 | 5,222.9 (*) | Thomaz (1988)                                                                                                                                      |
| 1804      | 11,045      | Macedo (1982, p. 209)                                                                                                                              |
| 1810      | 7,515.6     | Costa (2008, p. 17)                                                                                                                                |
| 1812      | 8,121       | Cardoso and Lains (2010)                                                                                                                           |
| 1817      | 10,436      | Cardoso and Lains (2010)                                                                                                                           |
| 1821      | 6,820       | Cardoso and Lains (2010)                                                                                                                           |
| 1827      | 6,660       | Carvalho (1828)                                                                                                                                    |
| 1828      | 11,030      | Mata and Valério (2001).                                                                                                                           |
| 1840      | 11,156      | Portugal (1840)                                                                                                                                    |
| 1834–44   | 7,625.6 (*) | Cardoso and Lains (2010)                                                                                                                           |

|      |        |                 |
|------|--------|-----------------|
| 1844 | 12,056 | Portugal (1844) |
|------|--------|-----------------|

Notes: One *conto de réis* corresponds to one million ( $10^9$ ) *réis* (or *reais*). Our “with empire” revenues category for the period of 1450–1499 corresponds to a single budget for 1473 which does not include empire revenues. We hence considered gold from Mina in 1487 and tax farming of slave trade—together, these correspond to 24,082,240 *réis* (Vogt 1979, appendix 1 and Elbl 1997, pp. 6–7). The 1511 central revenues correspond to a lower bound, as some pages of the original manuscript (see Figure 1) were lost. We did not use the incomplete 1635 and 1660 budgets reported in Hespanha (1994, pp. 114–5, 158), with the revenue of the *décima* missing from the latter. Until 1607, budgets do not account for the *terça* (see text). We interpret this as meaning that until then, the *terça* was spent at the subnational level. (\*) For these periods, nominal averages are shown above for convenience, but annual deflated numbers have been used to construct the results in the main text using annual unaveraged values.

**Table A2.** The Lisbon Customs and the Revenue of the Kingdom, 1367–1557

| <b>Years</b> | <b>Lisbon Customs</b>   | <b>Central revenues<br/>(without Empire)</b> | <b>Customs as % of total<br/>central revenues</b> |
|--------------|-------------------------|----------------------------------------------|---------------------------------------------------|
| <b>1367</b>  | 160,000 <i>libras</i>   | 960,000 <i>libras</i>                        | 16.6%                                             |
| <b>1401</b>  | 6,000,000 <i>libras</i> | 81,640,000 <i>libras</i>                     | 7.3%                                              |
| <b>1473</b>  | 4,700 <i>contos</i>     | 52,500 <i>contos</i>                         | 8.9%                                              |
| <b>1511</b>  | 10,723 <i>contos</i>    | 98,360 <i>contos</i>                         | 10.9%                                             |
| <b>1527</b>  | 12,120 <i>contos</i>    | 156,940 <i>contos</i>                        | 7.7%                                              |
| <b>1557</b>  | 50,500 <i>contos</i>    | 336,320 <i>contos</i>                        | 15%                                               |
| <b>1593</b>  | 133,804 <i>contos</i>   | 491,800 <i>contos</i>                        | 27.2%                                             |
| <b>1641</b>  | 152,246 <i>contos</i>   | 752,039 <i>contos</i>                        | 20.2%                                             |
| <b>1645</b>  | 152,246 <i>contos</i>   | 1,269,000 <i>contos</i>                      | 12.0%                                             |
| <b>1681</b>  | 269,857 <i>contos</i>   | 1,533,000 <i>contos</i>                      | 17.6%                                             |
| <b>1716</b>  | 700 <i>contos</i>       | 3,828,000 <i>contos</i>                      | 18.3%                                             |
| <b>1770</b>  | 1,175 <i>contos</i>     | 5,174,000 <i>contos</i>                      | 22.7%                                             |

|             |                     |                          |       |
|-------------|---------------------|--------------------------|-------|
| <b>1804</b> | 1,252 <i>contos</i> | 11,045,000 <i>contos</i> | 11.3% |
| <b>1810</b> | 548.9 <i>contos</i> | 6,316,000 <i>contos</i>  | 8.7%  |

*Sources:* For 1367–1557, Henriques (2009, p. 178); 1593 from Luz (1949, p. 42); 1625 from Hespanha (1994); 1641 and 1681 from Dias (1985); 1716 from Macedo (1982, pp. 209); 1770 corresponds to the average of the period 1762–77 from Thomaz (1988); 1804 from Macedo (1982, pp. 209). 1810 from Costa (2008).

*Notes:* We do not observe the Lisbon customs revenues for 1645, and assume they are the same as those of 1641. For 1762–77 and 1804, the sources do not break down the Lisbon customs revenue from the fees paid by the ships anchoring in Lisbon (*consulado*). For these years, we assume that customs revenue was 70% of the total for these years, based on the closest observable split (1730), which gives the customs surcharge tax (*Consulado*) as being worth 240 *contos* over the regular customs tax of 600 *contos* (Humbert 1730; Carrara 2011). This makes sense given that *consulado* represented 3% *ad valorem* of the unloaded cargo, whereas tariff rates were around one-tenth (Hespanha 1994, p. 120).

**Table A3.** Local level revenues in a sample of cities as a percentage of central state revenues, using alternative weights

|         | Preferred weight<br>(interpolation between 1527<br>population and 1913<br>municipal revenue) | Weighted by<br>1527 Population | Weighted by 1913 Revenues |
|---------|----------------------------------------------------------------------------------------------|--------------------------------|---------------------------|
| 1400–49 | 13.6%                                                                                        | 13.6%                          | 42.4%                     |
| 1450–99 | 7.2%                                                                                         | 7.2%                           | 11.2%                     |
| 1500–49 | 12.2%                                                                                        | 12.0%                          | 20.8%                     |
| 1550–99 | 10.8%                                                                                        | 10.9%                          | 15.9%                     |
| 1600–49 | 8.5%                                                                                         | 8.4%                           | 11.4%                     |
| 1650–99 | 3.7%                                                                                         | 4.3%                           | 5.1%                      |
| 1700–49 | 6.9%                                                                                         | 7.4%                           | 7.4%                      |
| 1750–99 | 7.0%                                                                                         | 6.8%                           | 6.8%                      |
| 1800–19 | 3.6%                                                                                         | 3.4%                           | 3.5%                      |

Sources and notes: As in Table 4 of the main text, but with fixed municipal weights at the 1527 level.

## APPENDIX B: SOURCES FOR CENTRAL REVENUES AND EXPENDITURE

*The accompanying data file for this paper details for which numbers each of the following sources were used.*

### Archival Sources

Arquivo Histórico do Tribunal de Contas, ER 5373

Arquivo Nacional da Torre do Tombo, Núcleo Antigo 532 and 590.

Biblioteca da Ajuda, Manuscritos, 51-VI-19, folia 359–364

Biblioteca D. Manuel II, Manuscritos, ADQ 094, folia 26–28.

Biblioteca Nacional, Códice 637, folia 17v.-25v.

### Printed Primary Sources

Carvalho, Manuel António de (1828). *Relatório apresentado na Câmara dos Senhores Deputados da Nação Portuguesa em 11 de Fevereiro de 1828 pelo Ministro e Secretario d'Estado dos Negocios da Fazenda*, Lisboa, Impressão Regia.

Dias, J. Alves (1985). Um documento financeiro do século XVII. *Nova História*, vol. VII, nº3/4

Dias, J. Alves (1996). *Gentes e espaços : em torno da população portuguesa na primeira metade do século XVI*. Lisboa: FCG/INCT.

Falcão, Figueiredo (1859). *Livro em que se Contem toda a Fazenda e Real Património dos Reinos de Portugal, India e Ilhas Adjacentes*. Lisboa: Imprensa Nacional

Humbert, Pierre (1730). *Description de ville de Lisbonne. Revenue de la couronne de Portugal*.

Luz, Francisco Mendes da (ed) (1949). *Relação de todas as rendas da coroa deste reino de Portugal que nele se arrecadao de que porcedem, modo e lugares em que se pagão*. Coimbra, Biblioteca da Universidade.

Oliveira, Frei Nicolau (1620). *Tratado das Grandezas de Lisboa*. Lisboa: Jorge Rodriguez.

Pinto, Pedro (2013a). Estimativa das receitas e despesas anuais do reino e India. *Fragmenta Histórica, Historia, Paleografia e Diplomática* 9: 153–159.

Pinto, Pedro (2013b). Folha da receita e despesa do reino para 1543. *Fragmenta Histórica, Historia, Paleografia e Diplomática* 9: 161–164.

Pinto, Pedro (2013c). Folha da receita e despesa do reino para 1563. *Fragmenta Histórica, Historia, Paleografia e Diplomática*, 9: 169–172

Portugal (1840). *Orçamento Geral do rendimento e Despesa do Estado*, Lisboa: Imprensa Nacional.

Portugal (1844). *Orçamento Geral do rendimento e Despesa do Estado*, Lisboa: Imprensa Nacional.

Portugal (1914). *Resumo dos orçamentos das câmaras municipais para o ano civil de 1913*. Lisboa, Imprensa Nacional.

Rego, António da Silva (1960). *As Gavetas da Torre do Tombo*. Lisboa: Centro de Estudos Históricos Ultramarinos. Vol. I, pp. 891–895.

Sanceau, Elaine (ed.) (1973). *Colecção São Lourenço I. Documentação Ultramarina Portuguesa*. Volume VI, Lisboa

Santarém, Visconde de (1844). *Quadro Elementar das relações políticas e diplomáticas de Portugal*, vol. 2, Paris.

Santarém, Visconde de (1850). *Quadro Elementar das relações políticas e diplomáticas de Portugal*, Paris, v. 5

### Secondary Sources

Cardoso, José Luis and Lains, Pedro (2010). *Paying for the Liberal State: the rise of Public Finance in Nineteenth century Europe*. Cambridge University Press.

Carrara, Angelo (2011). Receitas Imperiais Portuguesas, Estrutura e Conjunturas, séculos XVI/XVIII. *Working Paper, Universidade Federal de Juiz de Fora*.

Clark, Gregory (2005). The condition of the working class in England, 1209–2004. *Journal of Political Economy*, 113 (6), 1307–1340.

Costa, Fernando Dores (2008). Army size, military recruitment and financing in Portugal during the period of the Peninsula War 1808–1811. *E-journal of Portuguese History* 6 (2).

Costa, Patrícia (2018). As finanças municipais em Portugal no século XVIII: autonomia vs centralismo. *Ler História*, 73: 123–144.

Costa, Leonor Freire, Manuela Rocha and Rita Martins de Sousa (2013). *O Ouro do Brasil*. Lisboa, Imprensa Nacional.

Costa, Leonor Freire, Manuela Rocha and Rita Martins de Sousa (s.d.), *O Ouro do Brasil: Remessas e Agentes, 1720-1807*. Online database. Available at <https://www.iseg.ulisboa.pt/aquila/investigacao/GHES/investigacao/projetos-coordenados-pelo-ghes/ouro-do-brasil:-remessas-e-agentes,-1720-1807>

Elbl, Ivana (1997). The volume of the early Atlantic slave trade, 1450–1521. *Journal of African History* 31–75.



- Grafe, Regina (2012). *Distant tyranny: markets, power, and backwardness in Spain, 1650–1800*. Princeton University Press.
- Godinho, Vitorino Magalhães (1978). Finanças públicas e estrutura do Estado. In: *Ensaaios II*, Lisboa, Sá da Costa.
- Henriques, António (2009). *State finance, war and redistribution in Portugal, 1249-1527*. Doctoral dissertation, University of York.
- Henriques, António (2014). The rise of a tax state: Portugal, 1371–1401. *E-journal of Portuguese History*, 12(1), pp. 49-66.
- Henriques, António (2023). Reconstructing long-term population with discontinuous counts: Portugal, 1370–1530. *Unpublished manuscript*.
- Hespanha, António Manuel (2013). As finanças portuguesas nos séculos XVII e XVIII. *Cadernos do Programa de Pós-Graduação em Direito–PPGDir./UFRGS*, 8(2).
- Hunt, Philip A. and O'Brien, Patrick (n.d.). English state taxes and other revenues, 1485–1509. *European State Finance Database*. Available at <https://www.esfdb.org/table.aspx?resourceid=11225>, accessed Nov. 2021.
- Korner, Martin (n.d.). Total expenditure of the Prussian state, 1688-1806. *European State Finance Database*. Available at <https://www.esfdb.org/table.aspx?resourceid=11768>
- Macedo, Jorge Borges de (1982). *Problemas de história da indústria no século XVIII*. 2nd edition, Lisboa, Querco.
- Mata, M. E., & Valério, N. (2001). As finanças constitucionais portuguesas entre as duas guerras civis (1833-1845). *Revista de História Económica e Social*, 1 (2<sup>nd</sup> series), 135-144.
- Pereira, João Cordeiro (2003). *Portugal na Era de Quinhentos*. Cascais, Patrimónia.

Prestage, Edgar (1920). Três Consultas do Conselho da Fazenda de 1656 a 1657. *Revista de História*, 34 (pp. 5-26).

O'Brien, Patrick K. (1988). The political economy of British taxation, 1660–1815. *Economic History Review*, 1–32.

Ormrod, W. Mark (n.d.). The relative income from direct and indirect taxation in England, 1295–1454. Available at <https://www.esfdb.org/table.aspx?resourceid=11762>

Salvado, J. P. (2014). O Estanco do Tabaco em Portugal: contrato-geral e consórcios mercantis (1702–1755), in Santiago de Luxán (ed.), *Política y Hacienda del Tabaco en los Imperios Ibéricos (siglos XVII–XIX)*. Madrid, Centro de Estudios Políticos y Constitucionales, pp. 133–153.

Thomaz, Fernando (1988). As finanças do estado Pombalino 1762–1776. In: *Estudos e ensaios em homenagem a Vitorino Magalhães Godinho*. Lisboa: Sá da Costa.

Vogt, John (1979). *Portuguese Rule of the Gold Coast, 1469–1682*. Athens: University of Georgia Press.

## APPENDIX C: SOURCES FOR MUNICIPAL REVENUES AND EXPENSES

### Archival Sources

#### **Loulé**

Arquivo Municipal de Loulé, Receita e Despesa, Livros 9, 18, 21, 27, 33, 34, 35, 37, 40.

#### **Elvas**

Arquivo Municipal de Elvas, Receita e Despesa, Livros 1071 and 1075.

#### **Moura**

Livro de receita e despesa dos bens do concelho.

#### **Vila do Conde**

Arquivo Municipal de Vila do Conde, Vereações, Livros 827, 828, 829, 830, 831, 832, 833, 836, 837, 838, 839, 840, 841, 842, 843, 844, 845, 846, 847, 848, 849, 850, 851, 853.

### Printed Primary Sources

#### **Coimbra**

Câmara Municipal de Coimbra, *Orçamento Ordinário da Receita e Despesa da Câmara Municipal. 1855/56-1976*, Coimbra, Câmara Municipal, 1976.

#### **Porto**

Dias, João José Alves, ed.. (2016). *Cortes Portuguesas. Reinado de D. Afonso V. Cortes de 1439*. Lisboa. CEH.

### Secondary Sources

#### **Abrantes**

Silva, Joaquim Candeias (2016). *Abrantes: a vila e seu termo no tempo dos Filipes (1580–1640)*. Abrantes: Câmara Municipal.

### **Alter do Chão**

Ribeiro, Teresa Casquilho (1998). *O Município de Alter do Chão nos Finais do Séc. XVIII*. Viseu, Palimage.

### **Barcelos**

Capela, José Viriato (1995). *O Minho e Os Seus Municípios: Estudos Económico-Administrativos Sobre o Município Português Nos Horizontes Da Reforma Liberal*. Braga: Universidade do Minho.

Capela, J. V. (1989). *A câmara, a nobreza e o povo do concelho de Barcelos*, Barcelos, *Barcelos Revista*.

### **Braga**

Capela, José Viriato (1995). *O Minho e Os Seus Municípios: Estudos Económico-Administrativos Sobre o Município Português Nos Horizontes Da Reforma Liberal*. Braga: Universidade do Minho.

### **Caldas da Rainha**

Rodrigues, Luís Nuno (1992). Um século de finanças municipais: Caldas da Rainha (1720-1820). *Penélope: revista de história e ciências sociais*, 7: 49-70.

### **Cuba**

Fonseca, Teresa (2000). *Absolutismo e municipalismo: Évora, 1750-1820*. PhD, FCSH, Universidade Nova de Lisboa.

### **Coimbra**

Barbosa, José Luís dos Santos (2019). *As Finanças da Câmara Municipal de Coimbra (1601-1660)*, Coimbra, Palimage.

Barbosa, José Luís (2020). As finanças da Câmara Municipal de Coimbra nos finais do Antigo Regime (1762-1820): as receitas. *Revista Portuguesa de História*, 51: 107-149.

Brito, A. da Rocha (1943). As finanças quincentistas do município coimbrão, *Arquivo Coimbrão*, VII: 178-273.

### **Gouveia**

Mota, Eduardo (1990). *A Administração Municipal de Gouveia em Finais de Setecentos*. Gouveia, Gaudela.

### **Guarda**

Gomes, Rita Costa (1987). *A Guarda Medieval: Posição, Morfologia e Sociedade*. Lisboa, Livraria Sá da Costa.

### **Guimarães**

Braga, Alberto Vieira (1953). *A Administração Seiscentista do Município Vimaranense*, Guimarães, Câmara Municipal.

Capela, José Viriato (1995). *O Minho e Os Seus Municípios: Estudos Económico-Administrativos Sobre o Município Português Nos Horizontes Da Reforma Liberal*. Braga: Universidade do Minho.

### **Elvas**

Sequeira, J. and Ferreira, S. (2019). Gerir uma vila alentejana no século XV: as finanças municipais de Elvas em 1432–1433. *Fragmenta Historica*, 7.

### **Évora**

Fonseca, Teresa (2000). *Absolutismo e municipalismo: Évora, 1750–1820*. PhD thesis, FCSH, Universidade Nova de Lisboa.

### **Leiria**

Marques, A. H. de Oliveira (1990). *Atlas de cidades medievais portuguesas (séculos XII–XV)*. Lisboa, CEH.

### **Loulé**

Botão, Maria de Fátima (2009). *A construção de uma identidade urbana no Algarve medieval: o caso de Loulé*. Lisboa, Caleidoscópio.

### **Montemor-o-Novo**

Andrade, A. A. Banha de (1979). “Conspecto sócio-económico de uma vila alentejana da Renascença”, *Anais. Academia Portuguesa da História*, vol. 25 (II):159–274.

Fonseca, Jorge (1998). *Montemor-o-Novo no século XV*. Montemor, Câmara Municipal.

Fonseca, Teresa (1995). *Relações de poder no antigo regime a administração municipal em Montemor-o-Novo 1777–1816*. Câmara Municipal de Montemor-o-Novo.

### **Nisa**

Coelho, Maria Virgínia (1993). *Autonomias e despotismo: a Câmara e a Vila de Santarém no reinado de D. José*, Santarém, Câmara Municipal.

### **Penafiel**

Barbosa, José Luis dos Santos (2017). As receitas e despesas da Câmara de Penafiel: a importância das rendas nas finanças municipais (1782–1820)—*História. Revista da FLUP*. IV Série. Vol. 7, no 2.

### **Penalva do Castelo**

Monteiro, Paulo (2001). *Território, Elites e Governança. Penalva do Castelo em finais do Antigo Regime*, Mestrado thesis, FLUL, Universidade de Lisboa.

### **Porto**

Costa, Patrícia (2018). As finanças municipais em Portugal no século XVIII: autonomia vs centralismo. *Ler História*, 73: 123–144.

Gonçalves, Iria (1987). *As Finanças Municipais do Porto na segunda metade do século XV*. Porto, Câmara Municipal.

Machado, Maria de Fátima (2005). *O central e o local. A vereação do Porto de D. Manuel a D. João III*. Porto: Afrontamento.

Silva, Francisco Ribeiro da (1988). *O Porto e o seu termo 1580–1640: Os homens as instituições e o poder*. Porto, Câmara Municipal.

Valente, Patrícia Costa (2008). *Administrar, registar, fiscalizar, gastar: as despesas municipais do Porto*. *Administrar, registar, fiscalizar, gastar: as despesas municipais do Porto após a Guerra da Restauração: (1668-1696)*. Master's thesis, Universidade do Porto.

### **Santarém**

Beirante, Maria Ângela (1981). *Santarém quinhentista*, Lisboa, Livraria Portugal.

Coelho, Maria Virgínia (1993). *Autonomias e despotismo: a Câmara e a Vila de Santarém no reinado de D. José*, Santarém, Câmara Municipal.

Rodrigues, Martinho Vicente (2001). *Santarém no Tempo dos Filipes (1580–1640)*. Santarém, Câmara Municipal.

### **Viana do Castelo**

Capela, José Viriato (1995). As Contas da Câmara de Viana (1740–1770). Limites da sua autonomia financeira. *Estudos Regionais*, 15: 69–96.

Moreira, Manuel António Fernandes (1984). *O porto de Viana do Castelo na época dos descobrimentos*. Edição da Câmara Municipal de Viana do Castelo.

### **Viseu**

Soares, Sérgio Cunha (1984). Aspectos da Política Municipal Pombalina: a Câmara Viseu no reinado de D. José. *Revista Portuguesa de História*, XXI: 21–117.
